# Supplementary material for: Cationic vacancy engineering of p-TiO2 for enhanced photocatalytic nitrogen fixation
Source: Royal Society of Chemistry journal article supplement (doi:10.1039/d2nr06821d), 2023-01-01
Supplement: d2nr06821d1.pdf [file d2nr06821d1.pdf]

## Cationic vacancy engineering of p-TiO<sub>2</sub> for enhanced photocatalytic nitrogen fixation

Wenming Ding <sup>a</sup>, Xiaoman Li <sup>a,\*</sup>, Senda Su <sup>a</sup>, Zhenyu Liu <sup>a</sup>, Yue Cao <sup>a</sup>, Linghu Meng <sup>a</sup>, Shengbo Yuan <sup>a</sup>, Wenhui Wei <sup>a</sup>, Min Luo <sup>a,\*</sup>

<sup>a</sup> State Key Laboratory of High-efficiency Utilization of Coal and Green Chemical Engineering, School of Chemistry and Chemical Engineering, Ningxia University, Yinchuan, Ningxia 750021, PR China

E-mail: [luominjy@nxu.edu.cn](mailto:luominjy@nxu.edu.cn), [lixm2017@nxu.edu.cn](mailto:lixm2017@nxu.edu.cn)

### Table of Contents

1. Fig. S1: Standard curve for NH<sub>4</sub><sup>+</sup> concentration
2. Fig. S2: XRD patterns of p-TiO<sub>2</sub> precursor
3. Fig. S3: SEM images of (a) n-TiO<sub>2</sub> and (b) p-TiO<sub>2</sub> (II)
4. Fig. S4: (a) total XPS spectrum, (b) XPS spectra for C 1s of n-TiO<sub>2</sub> and p-TiO<sub>2</sub> (II)
5. Fig. S5: The EPR of p-TiO<sub>2</sub> (II) before and after cycle reaction
6. Fig. S6: <sup>1</sup>H NMR spectrum of the solution obtained after NRR on TiO<sub>2</sub> (II) using <sup>15</sup>N<sub>2</sub> as the reaction gas
7. Fig. S7: The NH<sub>4</sub><sup>+</sup> production rate of TiO<sub>2</sub> materials under visible light in Air
8. Fig. S8: The transient photocurrent curve of (a) n-TiO<sub>2</sub> and (b) p-TiO<sub>2</sub> (II)
9. Fig. S9: Mott-Schottky plots of (a) n-TiO<sub>2</sub> and (b) p-TiO<sub>2</sub> (II)
10. Table S1: The result for photocatalytic N<sub>2</sub> fixation in previous literature about other photocatalysts and our work

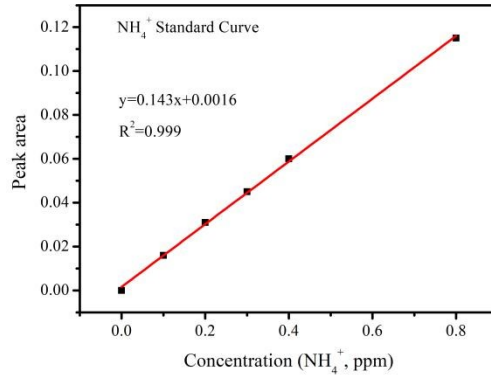

Fig. S1. Standard curve for NH<sub>4</sub><sup>+</sup> concentration.

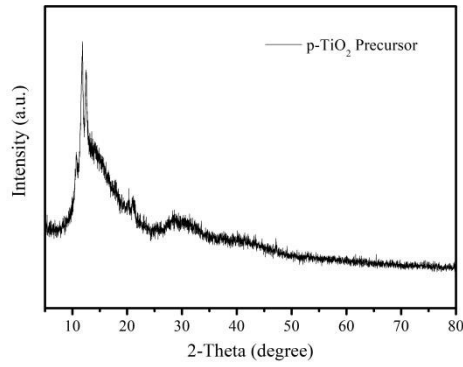

Fig. S2. XRD patterns of p-TiO<sub>2</sub> precursor.

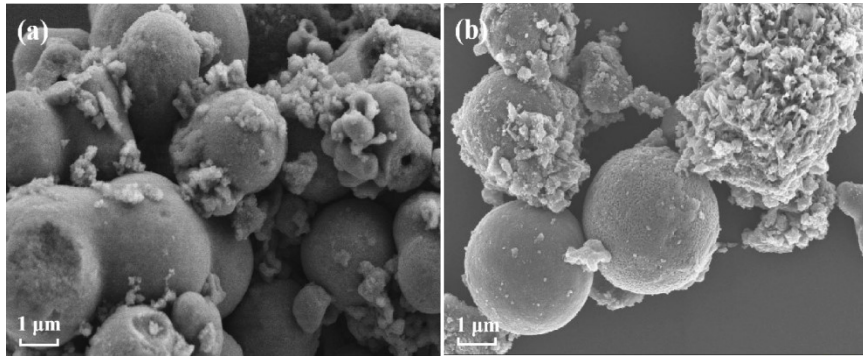

Fig. S3. SEM images of (a) n-TiO<sub>2</sub> and (b) p-TiO<sub>2</sub> (II).

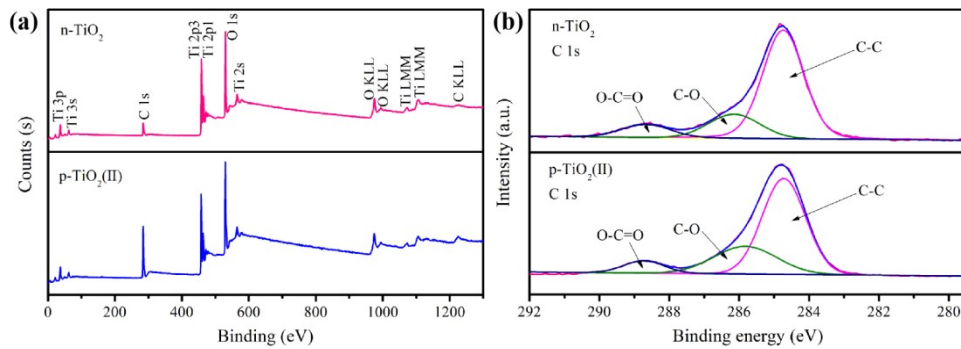

Fig. S4. (a) total XPS spectrum, (b) XPS spectra for C 1s of n-TiO<sub>2</sub> and p-TiO<sub>2</sub> (II).

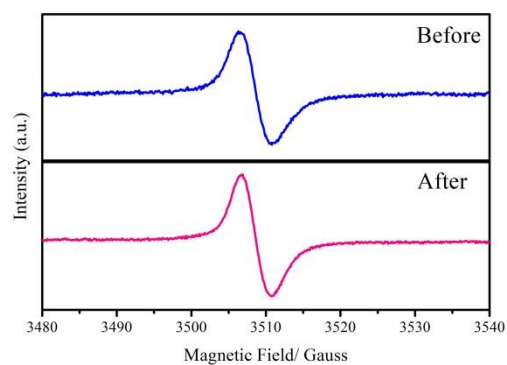

**Fig. S5.** The EPR of p-TiO<sub>2</sub> (II) before and after cycle reaction.

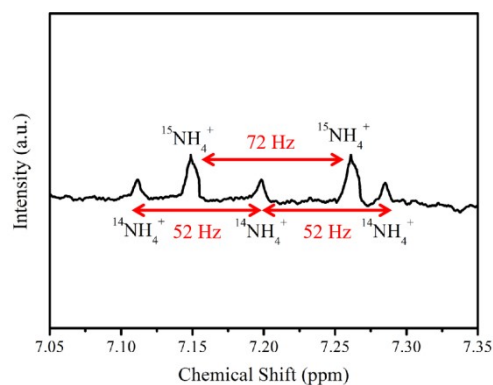

**Fig. S6.** <sup>1</sup>H NMR spectrum of the solution obtained after NRR on TiO<sub>2</sub> (II) using <sup>15</sup>N<sub>2</sub> as the reaction

gas

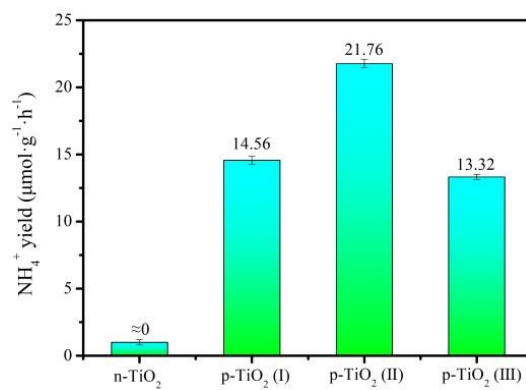

**Fig. S7.** The NH<sub>4</sub><sup>+</sup> production rate of TiO<sub>2</sub> materials under visible light in Air.

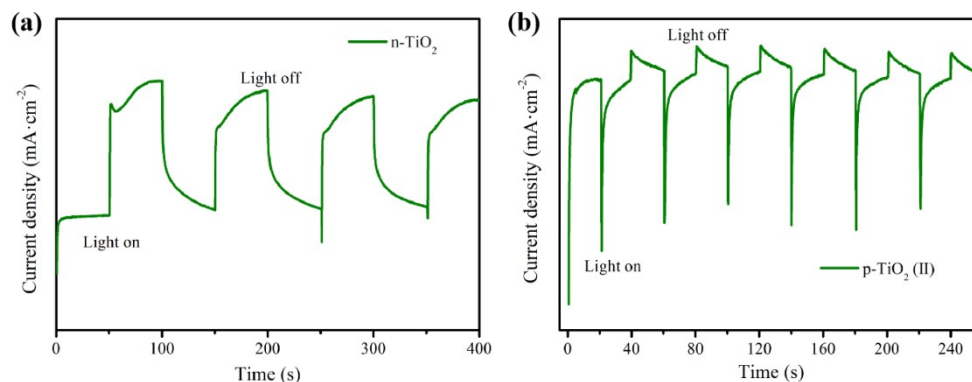

**Fig. S8.** The transient photocurrent curve of (a) n-TiO<sub>2</sub> and (b) p-TiO<sub>2</sub> (II).

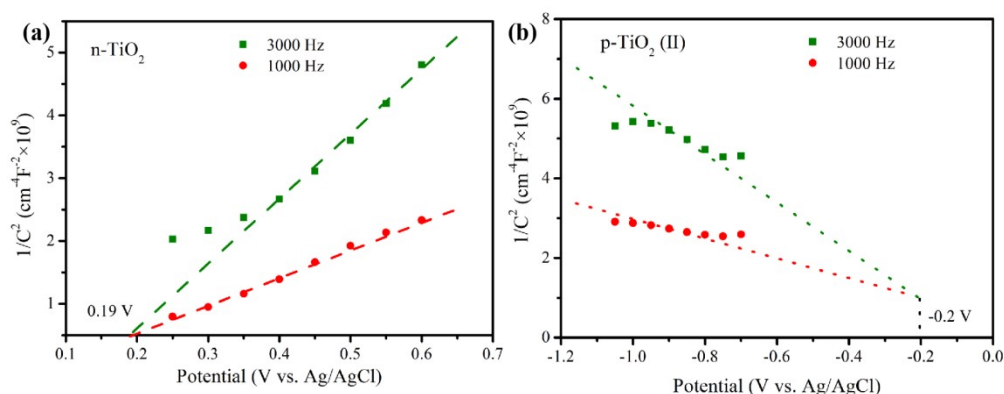

**Fig. S9.** Mott-Schottky plots of (a) n-TiO<sub>2</sub> and (b) p-TiO<sub>2</sub> (II).

**Table S1.** The result for photocatalytic N<sub>2</sub> fixation in previous literature about other photocatalysts and our work.

| Catalyst                            | Reaction medium                   | Scavenger        | Light Source                           | Ammonia generation rate                    | Reference |
|-------------------------------------|-----------------------------------|------------------|----------------------------------------|--------------------------------------------|-----------|
| V <sub>Ti</sub> -p-TiO <sub>2</sub> | H <sub>2</sub> O (l)              | No               | 300 W<br>Xenon lamp,<br>Full Spectrum  | 64.8 μmol·g <sup>-1</sup> ·h <sup>-1</sup> | This work |
| Fe-doped TiO <sub>2</sub>           | H <sub>2</sub> O (g) 40 °C        | No               | 360 W<br>Hg-Arc Lamp,<br>Full Spectrum | 11.5 μmol·g <sup>-1</sup> ·h <sup>-1</sup> | S1        |
| Ru/TiO <sub>2</sub>                 | H <sub>2</sub> O (l)              | No               | 150 W<br>Xe arc lamp,<br>Full Spectrum | 29.4 μmol·g <sup>-1</sup> ·h <sup>-1</sup> | S2        |
| Ru/TiO <sub>2</sub>                 | H <sub>2</sub> O (l),<br>alkaline | Ascorbic<br>acid | 250 W<br>Xenon lamp,<br>Full Spectrum  | 13.6 μmol·g <sup>-1</sup> ·h <sup>-1</sup> | S3        |
| Cu-doped<br>TiO <sub>2</sub>        | H <sub>2</sub> O (l)              | No               | 300 W<br>Xenon lamp,                   | 78.9 μmol·g <sup>-1</sup> ·h <sup>-1</sup> | S4        |

|                              |                                  |          |                              |                                             |    |
|------------------------------|----------------------------------|----------|------------------------------|---------------------------------------------|----|
|                              |                                  |          | Full spectrum                |                                             |    |
|                              |                                  |          | 300 W                        |                                             |    |
| CN-OvTiO <sub>2</sub>        | H <sub>2</sub> O (l)             | No       | Xenon lamp,<br>Full spectrum | 48.7 μmol·g <sup>-1</sup> ·h <sup>-1</sup>  | S5 |
|                              |                                  |          | 300 W                        |                                             |    |
| TiO <sub>2</sub> nanotube    | H <sub>2</sub> O (l)<br>Methanol | Methanol | Xenon lamp,<br>Full spectrum | 318 μmol·g <sup>-1</sup> ·h <sup>-1</sup>   | S6 |
|                              |                                  |          | 300 W                        |                                             |    |
| N-doping<br>TiO <sub>2</sub> | H <sub>2</sub> O (l)             | No       | Xenon lamp,<br>λ > 400 nm    | 80.09 μmol·g <sup>-1</sup> ·h <sup>-1</sup> | S7 |
|                              |                                  |          | 300 W                        |                                             |    |
| Ov-TiO <sub>2</sub>          | H <sub>2</sub> O (l)<br>Methanol | Methanol | Xenon lamp,<br>Full spectrum | 324.8 μmol·g <sup>-1</sup> ·h <sup>-1</sup> | S8 |

[S1] Schrauzer G N, Guth T D. Photolysis of water and photoreduction of nitrogen on titanium dioxide.

Journal of the American Chemical Society, 2002, 99(22): 7189-7193.

[S2] Ranjit K T, Varadarajan T K, Viswanathan B. Photocatalytic reduction of dinitrogen to ammonia over noble-metal-loaded TiO<sub>2</sub>. Journal of Photochemistry and Photobiology A: Chemistry, 1996, 96(1-3): 181-185.

[S3] Rao N N, Dube S. Manjubala; Natarajan, P. Photocatalytic Reduction of Nitrogen over (Fe, Ru or Os)/TiO<sub>2</sub> Catalysts. Applied Catalysis B: Environmental, 1994, 5: 33-42.

[S4] Zhao Y, Zhao Y, Shi R, et al. Tuning oxygen vacancies in ultrathin TiO<sub>2</sub> nanosheets to boost photocatalytic nitrogen fixation up to 700 nm. Advanced Materials, 2019, 31(16): 1806482.

[S5] Wu S, He C, Wang L, et al. High-efficiency electron tandem flow mode on carbon nitride/titanium dioxide heterojunction for visible light nitrogen photofixation. Chemical Engineering Journal, 2022, 443: 136425.

[S6] Comer, Benjamin M., and Andrew J. Medford. Analysis of photocatalytic nitrogen fixation on rutile TiO<sub>2</sub> (110). ACS Sustainable Chemistry & Engineering, 2018, 6(4): 4648-4660.

[S7] LI, Chang, et al. N-doping TiO<sub>2</sub> hollow microspheres with abundant oxygen vacancies for highly photocatalytic nitrogen fixation. *Journal of Colloid and Interface Science*, 2022, 609: 341-352.

[S8] Zhang, Guoqiang, et al. Constructing a tunable defect structure in TiO<sub>2</sub> for photocatalytic nitrogen fixation. *Journal of Materials Chemistry A*, 2020, 8(1): 334-341.
